# Supplementary material for: Addressing the Real-World Challenges of Immunoresistance to Botulinum Neurotoxin A in Aesthetic Practice: Insights and Recommendations from a Panel Discussion in Hong Kong
Source: MDPI journal article supplement (doi:10.3390/toxins15070456), 2023-07-12

**File S1.** Methods for the consumer studies

The 2018 and 2021 consumer studies were online surveys with country/territory representative samples, utilising similar methodology and respondent screening criteria, conducted by a consumer research agency. Data were collected using a semi-structured quantitative questionnaire. The list of countries/territories where the study was conducted and the sample breakdown are listed in the table below.

**Table S1.** Respondent sample size by countries in the consumer study

|             | 2018 survey | 2021 survey |
|-------------|-------------|-------------|
| Total       | 2201        | 2441        |
| Australia   | 500         | 505         |
| Hong Kong   | 250         | 255         |
| Korea       | 520         | 625         |
| Taiwan      | 370         | 375         |
| Thailand    | 360         | 365         |
| Singapore   | 100         | 105         |
| Philippines | -           | 105         |
| Indonesia   | -           | 106         |
| India       | 101         | -           |

Participant inclusion criteria were:

- Aged between 21 to 55 years
- Must have personally been administered with 3 or more botulinum toxin treatments
- Must not be a Xeomin (incobotulinumtoxinA, INCO) user
- Must fall into the following monthly household income categories
  - Australia: >AUD5,000
  - Hong Kong: >HKD30,000
  - Korea: >KRW4,000,000
  - Taiwan: >TWD70,000
  - Thailand: >THB50,000
  - Singapore: >SGD7,000
  - Philippines: >PHP50,000
  - Indonesia: >IDR5,000,000
  - India: >IDR200,000

**Table S2.** Respondent characteristics in the 2018 and 2020 consumer studies.

| <b>Characteristics</b>                  | <b>2018<br/>(N=2201)</b> | <b>2021<br/>(N=2441)</b> |
|-----------------------------------------|--------------------------|--------------------------|
| <b>Gender</b>                           |                          |                          |
| Male                                    | 15%                      | 15%                      |
| Female                                  | 85%                      | 85%                      |
| <b>Age, average (years)</b>             |                          |                          |
| 21–25                                   | 4%                       | 7%                       |
| 26–30                                   | 20%                      | 19%                      |
| 31–35                                   | 23%                      | 21%                      |
| 36–40                                   | 19%                      | 20%                      |
| 41–45                                   | 15%                      | 17%                      |
| 46–50                                   | 14%                      | 10%                      |
| 51–55                                   | 6%                       | 7%                       |
| <b>Average monthly household income</b> |                          |                          |
| Australia                               | AUD 13,774               | AUD 15,443               |
| Hong Kong                               | HKD 67,080               | HKD 76,569               |
| India                                   | INR 379,951              | -                        |
| Indonesia                               | -                        | IDR 28,113,208           |
| Korea                                   | KRW 8,156,731            | KRW 10,540,800           |
| Philippines                             | -                        | PHP 87,810               |
| Singapore                               | SGD 17,005               | SGD 20,715               |
| Taiwan                                  | TWD 117,622              | TWD 124,227              |
| Thailand                                | THB 92,263               | THB 89,027               |

**Figure S1.** Emotional impact of diminishing BoNT-A efficacy (overall)

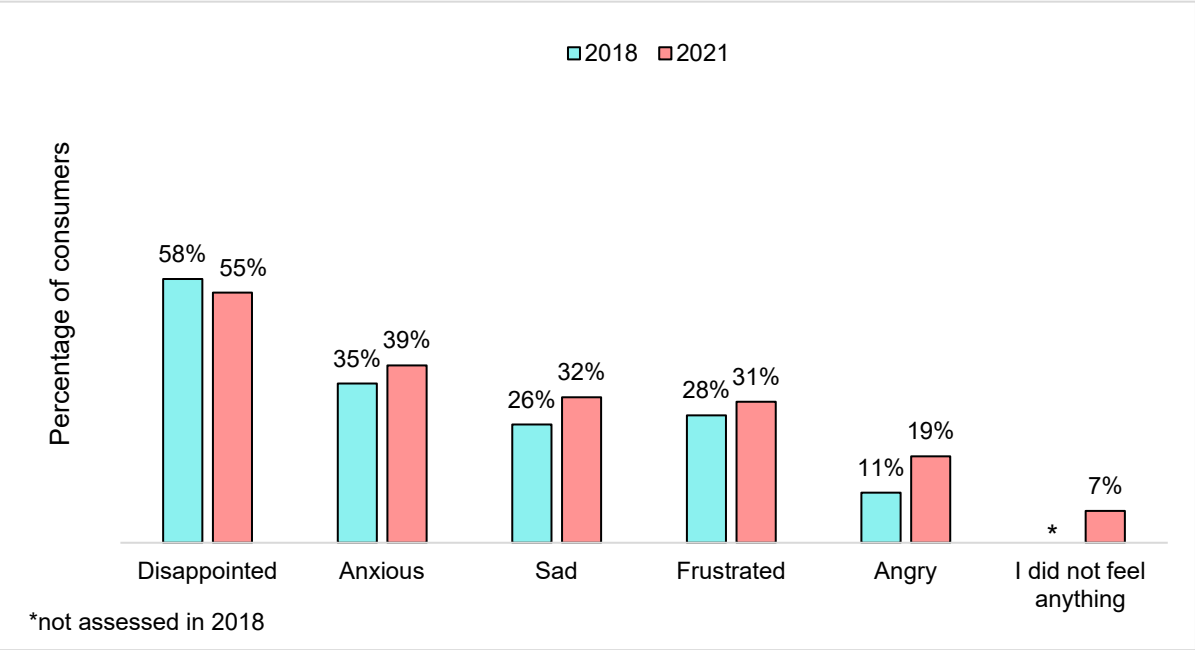

**Figure S2.** Consumer awareness and experience of diminishing BoNT-A treatment efficacy (Hong Kong data). (A) Awareness of diminishing efficacy and associated signs/symptoms. (B) Experienced diminishing efficacy

(A)

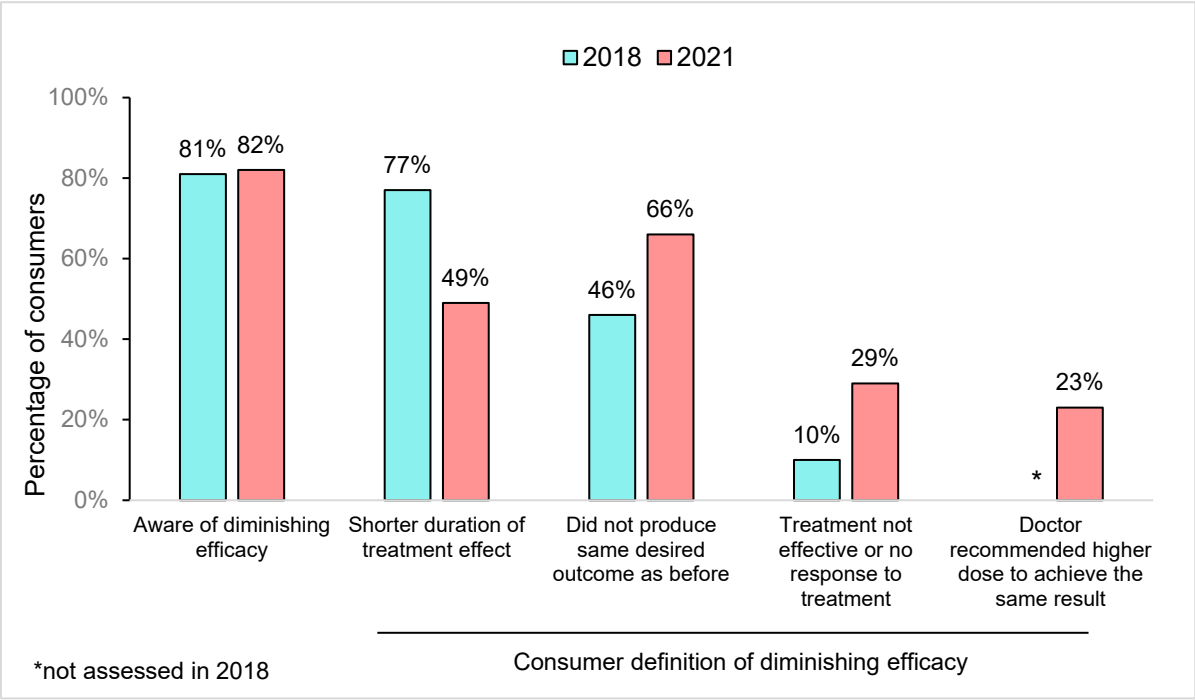

(B)

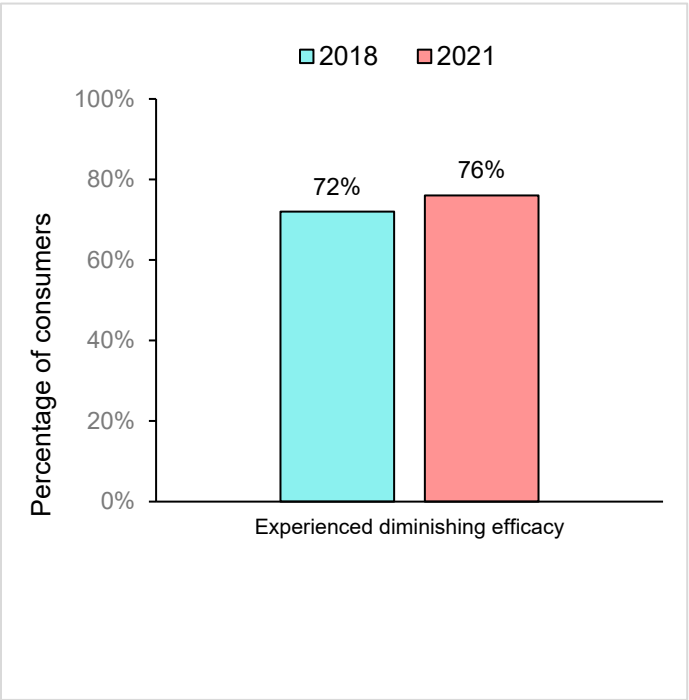

**Figure S3.** Emotional impact of diminishing BoNT-A treatment efficacy (Hong Kong data)

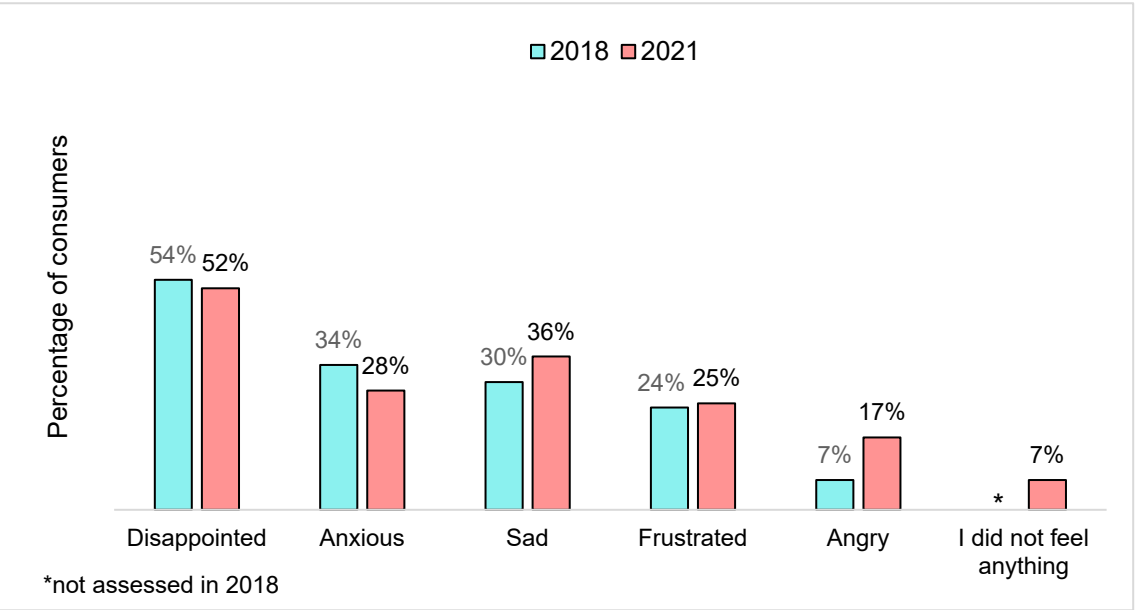

Supplement: s1 [file s1]
